1 **Presynaptic MAST Kinase Controls Bidirectional Post-Synaptic**  
2 **Responses to Convey Stimulus Valence in *C. elegans***

3 Shunji Nakano<sup>1,2</sup>, Muneki Ikeda<sup>2</sup>, Yuki Tsukada<sup>1,2</sup>, Xianfeng Fei<sup>3</sup>, Takamasa Suzuki<sup>4</sup>, Rhea  
4 Ahluwalia<sup>2</sup>, Ayana Sano<sup>2</sup>, Rumi Kondo<sup>2</sup>, Kunio Ihara<sup>5</sup>, Koichi Hashimoto<sup>6</sup>, Tetsuya  
5 Higashiyama<sup>2,7</sup> & Ikue Mori<sup>1,2,\*</sup>

6

7 <sup>1</sup>Neuroscience Institute, Graduate School of Science, Nagoya University, Furo-cho,  
8 Chikusa-ku, Nagoya, Aichi 464-8602, Japan.

9 <sup>2</sup>Division of Biological Science, Graduate School of Science, Nagoya University, Furo-cho,  
10 Chikusa-ku, Nagoya, Aichi 464-8602, Japan.

11 <sup>3</sup>Faculty of Science and Technology, Tohoku Bunka Gakuen University, Sendai, Miyagi  
12 981-0943, Japan.

13 <sup>4</sup>Department of Biological Chemistry, College of Bioscience and Biotechnology, Chubu  
14 University, Kasugai, Aichi 487-8501, Japan.

15 <sup>5</sup>Center for Gene Research, Nagoya University, Furo-cho, Chikusa-ku, Nagoya, Aichi  
16 464-8602, Japan.

17 <sup>6</sup>Graduate School of Information Sciences, Tohoku University, Sendai, Miyagi 980-8579,  
18 Japan.

19 <sup>7</sup>Institute of Transformative Bio-Molecules (WPI-ITbM), Furo-cho, Chikusa-ku, Nagoya,  
20 Aichi 464-8601, Japan.

21 \*Correspondence: [m46920a@nucc.cc.nagoya-u.ac.jp](mailto:m46920a@nucc.cc.nagoya-u.ac.jp)

22

23

24 **Abstract**

25 **Presynaptic plasticity is known to modulate the strength of synaptic transmission.**

26 **However, it remains unknown whether regulation in presynaptic neurons alters the**

27 **directionality –positive or negative- of postsynaptic responses. We report here that the**

28 ***C. elegans* homologs of MAST kinase, Stomatin and Diacylglycerol kinase act in a**

29 **thermosensory neuron to elicit in its postsynaptic neuron an excitatory or inhibitory**

30 **response that correlates with the valence of thermal stimuli. By monitoring neural**

31 **activity of the valence-coding interneuron in freely behaving animals, we show that**

32 **the alteration between excitatory and inhibitory responses of the interneuron is**

33 **mediated by controlling the balance of two opposing signals released from the**

34 **presynaptic neuron. These alternative transmissions further generate opposing**

35 **behavioral outputs necessary for the navigation on thermal gradients. Our findings**

36 **reveal the previously unrecognized capability of presynaptic regulation to evoke**

37 **bidirectional postsynaptic responses and suggest a molecular mechanism of**

38 **determining stimulus valence.**

## 39 **Introduction**

40 Sensory stimuli that predict the valence of reward or punishment are major drivers of  
41 animal behaviors. For example, odors associated with predators are detrimental to the  
42 animals and elicit fear responses<sup>1</sup>, while smells predicting the presence of food or potential  
43 mates evoke different behaviors such as feeding<sup>2</sup> or mating<sup>3</sup>. Extracting the valence  
44 information of sensory stimulus – whether the stimulus is attractive or aversive- and  
45 manifesting appropriate behavioral responses are the most vital function of the nervous  
46 system. Deciphering the molecular and circuit mechanisms underlying the valence coding  
47 of sensory information is thus fundamental to understand the principles of how animal  
48 behaviors emerge from the nervous system.

49         The valences of innate odor responses are guided by intrinsic property of the  
50 responding neurons, in which neurons expressing specific odorant receptors are hardwired  
51 in a neural circuit that elicits attractive or aversive behavior<sup>4,5</sup>. A similar labeled-line circuit  
52 operation was also demonstrated for encoding and responding to tastes such as sweet and  
53 bitter<sup>6-8</sup>, wherein cells expressing specific taste receptors are embedded in a specialized

54 neural circuit that promotes or inhibits feeding behaviors.

55           Contrary to these developmentally programmed, stereotyped behaviors, the

56 valence associated with certain sensory stimuli can vary depending on the past experience,

57 the current environmental context and the stimulus intensity<sup>9</sup>. For example, olfactory

58 preferences to the same odorants can differ depending on the odorant concentration<sup>10</sup>.

59 Studies of worms, flies and mammals suggested a common feature of neural mechanism

60 underlying the change in these odorant valences, wherein different concentrations of the

61 same odorants recruit distinct sets of olfactory neurons and consequently change the

62 perception of the same odorants<sup>11-13</sup>. However, the extent to which the brain utilizes

63 different encoding strategies for alternating stimulus valence remains largely unexplored. In

64 particular, the molecular and circuit mechanisms underlying the perception of altering

65 valence for other sensory modalities are not yet understood.

66           The compact nervous system of *C. elegans* consisting of only 302 neurons

67 provides an excellent opportunity to explore these questions<sup>14</sup>. *C. elegans* exhibits

68 thermotaxis behavior<sup>15</sup>, in which the valence of thermal information varies depending on

69 the past experience, current temperature environment and feeding states. Specifically, the  
70 temperature preference of *C. elegans* is plastic and determined by the cultivation  
71 temperature, in which animals that are cultivated at a constant temperature with food  
72 migrate toward that cultivation temperature on a thermal gradient without food<sup>15</sup>. When  
73 animals were placed at the temperature below the cultivation temperature they migrate up  
74 the thermal gradient, while above the cultivation temperature they move down the gradient,  
75 indicating that the valence associated with thermal stimuli alternates in opposing manners  
76 depending on the current temperature.

77           Previous studies identified neurons involved in thermotaxis<sup>16-18</sup>. Of those neurons,  
78 the AFD thermosensory neurons are essential for thermotaxis and are required for  
79 migrating up and down the thermal gradient to reach the cultivation temperature<sup>17,19</sup>.  
80 Calcium imaging analyses revealed that the AFD neuron displayed increases in calcium  
81 concentration upon warming phases of a temperature ramp both below and above the  
82 cultivation temperature<sup>20,21</sup>. However, it remains to be determined how the AFD neuronal  
83 activities with similar calcium dynamics below and above the cultivation temperature are

84 transformed to encode appropriate valence of temperature information and the consequent  
85 manifestation of opposing behavioral regulations.

86           Here we report that the AFD neuron evokes opposing neuronal responses in its  
87 postsynaptic partner AIY interneuron below or above the cultivation temperature: the  
88 activation of AFD neuron stimulates the AIY neuron below the cultivation temperature,  
89 while it inhibits AIY above that temperature. We identified molecular components  
90 important for this process and showed that this alteration of the AFD-AIY communication  
91 is regulated by presynaptic actions of the *C. elegans* homologs of MAST  
92 (Microtubule-Associated Serine-Threonine) kinase<sup>22</sup>, Stomatin<sup>23</sup> and Diacylglycerol  
93 kinase<sup>24,25</sup>. Our results further suggest that the alteration of the AFD-AIY synaptic  
94 transmission is mediated by the balance of two opposing signals released from the AFD  
95 neuron, an excitatory peptidergic signaling and an inhibitory glutamatergic signaling. A  
96 high-throughput behavioral analysis revealed that these alternative modes of the AFD-AIY  
97 transmission generate opposing behavioral biases in the steering direction of animal  
98 locomotion to warmer or colder side of the temperature gradient, thereby driving the

99 animals toward the cultivation temperature. Our results suggest that bidirectional responses  
100 in the valence-coding neurons are regulated by presynaptic mechanism whereby the  
101 evolutionarily conserved MAST kinase, Stomatin and Diacylglycerol kinase control the  
102 presynaptic release of opposing signaling molecules.  
103

104

## 105 **Results**

### 106 ***kin-4*, *mec-2* and *dgk-1* Regulate the *C. elegans* Thermotaxis Behavior**

107 To elucidate the molecular and neural mechanisms underlying the valence coding of  
108 thermal stimuli during *C. elegans* thermotaxis behavior, we conducted forward genetic  
109 screens and sought mutants that displayed abnormal thermotaxis behavior. We found that  
110 mutations in three genes, *kin-4*, *dgk-1* and *mec-2*, affected this behavior (Fig. 1). While the  
111 wild-type animals that had been cultivated at 20 °C preferred to stay around the cultivation  
112 temperature, loss-of-function mutants of *kin-4*, which encodes the *C. elegans* ortholog of  
113 the mammalian MAST (Microtubule Associated Serine Threonine) kinase, displayed a  
114 cryophilic phenotype and migrated toward a colder temperature region than the wild-type  
115 animals (Fig. 1b and Supplementary Fig. 1a). This defect was rescued by introduction of a  
116 *kin-4* genomic clone (Fig. 1c), indicating that *kin-4* is required for thermotaxis. Animals  
117 carrying mutations in the gene *dgk-1*, which encodes a homolog of Diacylglycerol kinase  
118  $\theta^{24,25}$ , also preferred to migrate toward a colder temperature region, as was previously  
119 reported<sup>26</sup> (Fig. 1b and Supplementary Fig. 1a). The cryophilic phenotype of *dgk-1(nj274)*



120 mutants was rescued by introduction of a *dgk-1* genomic clone (Supplementary Fig. 1b),  
121 indicating that *dgk-1* is required for thermotaxis. We also isolated a mutation in *mec-2*,  
122 which encodes a *C. elegans* homolog of Stomatin<sup>23</sup>. *mec-2(nj89)* animals harbored a  
123 mutation that is predicted to alter the glutamic acid 270 to a lysine (*E270K*, see  
124 Supplementary Fig. 1a), and displayed a thermophilic phenotype (Fig. 1b). Introduction of  
125 a mutant *mec-2(E270K)* clone into the wild-type animals phenocopied *mec-2(nj89)* mutants,  
126 while introduction of a wild-type *mec-2* clone into *mec-2(nj89)* mutants did not rescue the  
127 thermophilic defect (Fig. 1d). We also generated a null allele of *mec-2(nj251 Δ)*  
128 (Supplementary Fig. 1a) and found that *mec-2* null mutants were grossly normal in  
129 thermotaxis (Supplementary Fig. 1c), suggesting that some of the nine additional Stomatin  
130 genes encoded by the *C. elegans* genome could compensate the deficit of *mec-2*. These  
131 results indicate that *mec-2(nj89)* is a gain-of-function mutation and causes a thermophilic  
132 phenotype.

133           To address genetic interactions among these genes, we analyzed thermotaxis  
134 behaviors of double mutants. Animals carrying mutations in both *kin-4* and *mec-2* showed a

135 thermophilic phenotype similar to that of *mec-2* single mutants (Fig. 1e), suggesting that  
136 *mec-2* acts downstream of or in parallel to *kin-4*. Similarly, *dgk-1* mutations partially  
137 suppressed the thermophilic phenotype conferred by *mec-2(nj89gf)* mutation (Fig. 1f),  
138 suggesting that *dgk-1* acts downstream of or in parallel to *mec-2*. We hereafter focused on  
139 *kin-4(tm1049Δ)*, *mec-2(nj89gf)* and *dgk-1(nj274Δ)* mutants for further analyses.

140

#### 141 ***kin-4*, *mec-2* and *dgk-1* Function in the AFD Thermosensory Neuron to Regulate** 142 **Thermotaxis**

143 To ask where *kin-4* and *mec-2* are expressed, we conducted expression analysis. We  
144 generated a functional *kin-4::gfp* translational transgene capable of rescuing the cryophilic  
145 phenotype of *kin-4* mutants (Supplementary Fig. 2a). This transgene was broadly expressed  
146 in the nervous system, and its expression was observed in neurons previously shown to be  
147 involved in thermotaxis<sup>16,17,27</sup>, including the AFD and AWC thermosensory neurons and the  
148 AIY and RIA interneurons (Figs. 2a and b, and Supplementary Fig. 2b). We also assessed  
149 expression of *mec-2* and found that a *Pmec-2c::gfp* reporter was expressed in AFD and

150 AWC (Fig. 2b). As previously reported<sup>23</sup>, expression in mechanosensory neurons was also  
151 observed when *gfp* was fused to a promoter for another *mec-2* isoform, *mec-2a*  
152 (Supplementary Fig. 2c). A previous study also showed that *dgk-1* was ubiquitously  
153 expressed in the nervous system<sup>25</sup>. These results suggest that *kin-4*, *mec-2* and *dgk-1* are  
154 expressed in neurons known to be involved in regulation of thermotaxis, including the AFD  
155 and AWC thermosensory neurons.

156 To identify the neuron(s) in which *kin-4*, *mec-2* and *dgk-1* act to regulate  
157 thermotaxis, we attempted to express each of these genes in single neurons and assessed  
158 their effects on the thermotaxis behavior. Expression of a *kin-4* cDNA in AFD rescued the  
159 cryophilic phenotype of *kin-4* mutants, whereas expression in AWC, AIY, AIZ or RIA did  
160 not (Fig. 2c), indicating that *kin-4* functions in AFD to regulate thermotaxis. When mutant  
161 *mec-2(E270K)* was expressed in AFD, it phenocopied *mec-2(nj89gf)* mutants, while  
162 expression in AWC did not (Fig. 2d). Expression of a *dgk-1* cDNA in AFD but not in AWC  
163 partially rescued the cryophilic phenotype of *dgk-1* mutants (Fig. 2e). We also observed  
164 that simultaneous expression of *dgk-1* in both AFD and AWC fully rescued the *dgk-1*

165 mutant phenotype. These results indicate that *kin-4*, *mec-2* and *dgk-1* function in AFD to  
166 regulate thermotaxis.

167

### 168 ***kin-4*, *mec-2* and *dgk-1* Act Downstream of Calcium Influx in AFD**

169 To assess whether *kin-4*, *mec-2* and *dgk-1* regulate temperature-evoked activity of the AFD  
170 thermosensory neuron, we conducted calcium imaging of AFD. We immobilized animals  
171 expressing the GCaMP3 calcium indicator in AFD and subjected the animals to a warming  
172 stimulus. As previously reported<sup>20,21</sup>, the AFD neuron showed increases in calcium  
173 concentration upon warming stimuli both below and above the cultivation temperature  
174 (Figs. 3a and b), and this response required three guanylate cyclase genes, *gcy-8*, *gcy-18*  
175 and *gcy-23* exclusively expressed in the AFD neurons<sup>28-30</sup> (Fig. 3b). The  
176 temperature-evoked calcium responses of AFD in *kin-4*, *mec-2* and *dgk-1* mutants were  
177 almost indistinguishable from that of the wild-type animals (Fig. 3b-d). These results  
178 suggest that *kin-4*, *mec-2* and *dgk-1* regulate a process downstream of the calcium influx in  
179 AFD.

180

181 **Valence of Thermal Information Is Encoded by Bidirectional AIY Response**

182 To ask whether *kin-4*, *mec-2* and *dgk-1* regulate the activity of the AIY interneuron, the  
183 sole chemical postsynaptic partner of AFD<sup>14</sup>, we monitored calcium dynamics of both AFD  
184 and AIY. We generated the animals expressing a calcium indicator in both AFD and AIY  
185 and subjected them to warming stimuli while they were freely moving under the  
186 microscope with an automated tracking system (Fig. 4). We first subjected animals to a  
187 warming stimulus below the cultivation temperature, in which the temperature was  
188 increasing toward the cultivation temperature (Fig. 4a). When the wild-type animals were  
189 exposed to this warming stimulus, the AFD neuron showed an increase in calcium  
190 concentration, and the AIY neuron also displayed a rise in calcium concentration after a  
191 slight drop observed at the beginning of the warming stimulus (Fig. 4b). By contrast, when  
192 the wild-type animals were subjected to a warming stimulus above the cultivation  
193 temperature, where the temperature was increasing away from the cultivation temperature  
194 (Fig. 4e), the AIY neuron instead showed a decrease in calcium concentration, despite the

195 increase of calcium level in AFD (Fig. 4f). These results indicate that the bidirectional  
196 response of the AIY neuron correlates with the valence of thermal stimuli, with temperature  
197 increase toward the cultivation temperature evoking excitatory response and temperature  
198 increase away from the cultivation temperature inhibitory response.

199

#### 200 ***kin-4*, *mec-2* and *dgk-1* Regulate Bidirectional AIY Response**

201 We next examined the AIY responses in *kin-4*, *dgk-1* and *mec-2* mutants. The AIY neuron  
202 in *kin-4* mutants exhibited a decrease in calcium concentration even below the cultivation  
203 temperature, the condition in which the wild-type AIY neuron would normally increase its  
204 calcium level (Figs. 4b and c). Consistent with the calcium imaging analysis of AFD in  
205 immobilized animals (Fig. 3), the AFD neuron of *kin-4* mutants showed increases in  
206 calcium concentration both below and above the cultivation temperature (Figs. 4b and c).  
207 The defect in the AIY response of *kin-4* mutants was partially rescued by expression of a  
208 *kin-4* cDNA solely in the AFD neuron (Figs. 4b and d), indicating that the AIY calcium  
209 response is indeed modulated by its presynaptic partner AFD. A similar response profile was

210 also observed in the cryophilic *dgk-1* mutants: the AIY calcium level dropped upon  
211 warming stimuli both below and above the cultivation temperature, while the AFD neuron  
212 responded to the warming stimuli by increasing the calcium concentration (Figs. 4b, c, f  
213 and g). Furthermore, the thermophilic *mec-2* mutants showed an abnormal increase in the  
214 AIY calcium concentration even above the cultivation temperature (Figs. 4f and g).  
215 Similarly in the wild type, the AFD neurons in *mec-2* mutants showed increases in calcium  
216 concentration under both conditions tested (Figs. 4b and f). These results indicate that the  
217 valence-coding bidirectional AIY activity is regulated by *kin-4*, *mec-2* and *dgk-1*. Given  
218 that *kin-4* expression only in AFD restored the defect of the AIY response in *kin-4* mutants,  
219 these results further suggest that presynaptic regulation is important for determining the  
220 bidirectional responses of the AIY neuron.

221           A recent study reported that the difference in the AIY calcium responses below or  
222 above the cultivation temperature was represented by a difference in the fraction of animals  
223 in which AIY showed an increase in calcium concentration upon warming stimulus under  
224 the experimental condition where the animals were immobilized<sup>31</sup>. Our results further

225 suggest that in freely behaving animals, the AFD-AIY transmission can alter between  
226 excitatory and inhibitory communication below or above the cultivation temperature.

227

228 **Alteration of the AFD-AIY Synaptic Transmission Requires Components Essential**  
229 **for Neuropeptide and Glutamate Release**

230 We next asked how the presynaptic regulation in AFD evokes opposing neuronal responses  
231 in the AIY postsynaptic neuron. Previous studies indicated that AFD employs two kinds of  
232 signaling molecules to communicate with AIY<sup>27,32</sup>: one is neuropeptide, and the other is  
233 glutamate. The peptidergic signaling was shown to be excitatory<sup>32</sup>, whereas the  
234 glutamatergic input is inhibitory due to a glutamate-gated chloride channel acting on AIY<sup>27</sup>.  
235 We hypothesized that the balance of these two opposing signals released from AFD might  
236 be modulated, thereby inducing an excitatory or inhibitory postsynaptic response. To test  
237 this possibility, we monitored the AIY calcium response in mutants for the gene *unc-31*,  
238 which encodes the *C. elegans* ortholog of calcium-dependent activator protein required for  
239 secretion of neuropeptides<sup>33</sup>. The AIY neurons of *unc-31* mutants failed to increase the



240 calcium level and instead showed a decrease even below the cultivation temperature, while  
241 the AFD neuron showed increases in calcium concentration under both conditions tested  
242 (Figs. 5a-c). This defect in the bidirectional AIY response was partially rescued by  
243 expression of an *unc-31* cDNA only in AFD (Figs. 5b and d), indicating that the peptidergic  
244 signals from AFD is required for the bidirectional AIY response.

245         We also examined the AIY response in mutants for the *eat-4* gene, which encodes  
246 a *C. elegans* homolog of vesicular glutamate transporter required for transporting glutamate  
247 into synaptic vesicles<sup>34</sup>. In *eat-4* mutants, the AIY neurons displayed abnormal increase in  
248 the calcium concentration above the cultivation temperature (Figs. 5e-g), and this defect  
249 was rescued by expression of *eat-4* only in the AFD neurons (Figs. 5f and h). Like in  
250 *unc-31* mutants, the AFD neurons in *eat-4* mutants showed increase in the calcium level  
251 under both conditions tested. These results suggest that alteration of the positive and  
252 negative modes of the AFD-AIY communication is mediated by the presynaptic control of  
253 the glutamatergic and peptidergic outputs.

254

255 ***kin-4*, *mec-2* and *dgk-1* Regulate Curving Bias During Thermotaxis**

256 To address how the alteration in the modes of the AFD-AIY communication contributes to  
257 the regulation of thermotaxis behavior, we undertook multi-worm tracking analysis<sup>35</sup>. We  
258 classified the animal behavior into several behavioral components discernable during *C.*  
259 *elegans* locomotion, such as forward locomotion, turns and reversals<sup>36</sup>. We sought the  
260 behavioral components that were oppositely biased below or above the cultivation  
261 temperature in the wild-type animals, and were oppositely affected by the cryophilic (*kin-4*  
262 and *dgk-1*) or thermophilic (*mec-2*) mutations. Among the behavioral components we have  
263 examined (Fig. 6), we found that the curve, change in the moving direction during forward  
264 locomotion, was one such component (Fig. 6a): the wild-type animals behaving below the  
265 cultivation temperature showed curving bias toward warmer temperature when migrating  
266 up the thermal gradient, while they curve toward colder temperature above the cultivation  
267 temperature<sup>36</sup> (Fig. 6a), suggesting that this regulation of the curve would drive the animals  
268 toward the cultivation temperature. By contrast, the curving rates of the two cryophilic  
269 mutants, *kin-4* and *dgk-1*, below the cultivation temperature were abnormally biased toward

270 the colder side (Fig. 6a). Furthermore, *mec-2* mutants behaving above the cultivation  
271 temperature failed to show a curving bias toward colder temperature (Fig. 6a). These results  
272 indicate that *kin-4*, *mec-2* and *dgk-1* regulate the curve during thermotaxis and suggest that  
273 the alteration of the AFD-AIY synaptic transmission generates opposing curving biases that  
274 drive the animals toward the cultivation temperature.  
275

276 **Discussion**

277 When animals encounter environmental stimuli, they need to quickly assess whether the  
278 stimuli are beneficial or detrimental. How the brain determines whether the valence of  
279 sensory information is attractive or aversive has been a fundamental question in  
280 neurobiology. A number of previous studies indicated that the opposing valences of sensory  
281 stimuli are encoded by two separate populations of neurons, each of which represents either  
282 positive or negative valence of the stimuli<sup>37,38</sup>. By contrast, recent studies proposed an  
283 alternative strategy, wherein a single population of neurons responds to appetitive or  
284 aversive stimuli and represents the positive or negative valence of the stimuli by increasing  
285 or decreasing neuronal activity<sup>39,40</sup>. Specifically, CRF (corticotropin-releasing  
286 factor)-releasing neurons in the paraventricular nucleus of the hypothalamus are activated  
287 by aversive stimuli and inhibited by appetitive stimuli<sup>40</sup>. Likewise, in *C. elegans*,  
288 experience-dependent modulation enables a single set of interneurons to elicit bidirectional  
289 responses to carbon dioxide, which can be either attractive or aversive, depending on prior  
290 experience<sup>39</sup>. Thus, these observations indicate a previously unrecognized mechanism of  
291 valence coding for even a single modality of stimulus, in which the bidirectional activity in

292 a single population of neurons can be modulated by prior experience and environment to  
293 represent stimulus valence. However, little was known about the molecular mechanism and  
294 circuit logics for such modulation of valence-coding activity. In this study, we report the  
295 molecular components important for determining a valence-coding activity and show that  
296 MAST kinase, Stomatin and Diacylglycerol kinase control the activity of the AIY neuron  
297 that correlates with the valence of thermal stimuli. Our results also reveal a circuit principle  
298 of such valence coding, in which a presynaptic neuron modulates its neuronal outputs and  
299 evokes an excitatory or inhibitory postsynaptic response.

300           We showed that *kin-4*, *mec-2* and *dgk-1* regulate the curving bias during  
301 thermotaxis behavior (Fig. 6). A previous study also showed that optogenetic manipulations  
302 of the AIY activity evoked biases in the curve: stimulation of AIY caused the animals to  
303 turn in the direction in which the head of the animal was bent at the time of the AIY  
304 excitation, while inhibition of AIY induced the animals to turn in the opposite direction<sup>41</sup>.  
305 Given this observation, our results suggest that below the cultivation temperature, a  
306 warming stimulus activates both AFD and AIY, leading to curve toward the warmer side of

307 the temperature gradient, while above the cultivation temperature, a warming stimulus  
308 activates AFD, which in turn inhibits AIY, resulting in curving toward the colder side  
309 (Supplementary Fig. 3). Thus, the alteration of the AFD-AIY transmission mode would  
310 generate the curving bias that drives the animals toward the cultivation temperature.

311           Recent investigation of the global brain dynamics in *C. elegans* revealed that  
312 most interneuron layers represent the motor states of the animals<sup>42</sup>. Indeed, representation  
313 of the motor states is pervasive even in the first-layer interneurons that receive direct inputs  
314 from sensory neurons. The activity of the AIB interneuron, which is directly innervated by  
315 gustatory sensory neurons ASE and olfactory neurons AWC, is correlated with reversals<sup>43</sup>,  
316 and the AIY neuron can represent multiple motor states<sup>41,43,44</sup>. Because calcium dynamics  
317 within the AFD, ASE and AWC neurons represent the respective sensory stimuli<sup>20,21,45-47</sup>,  
318 these observations suggest that transformation of sensory information into motor  
319 representation occurs early in the neural circuit and underlies between the sensory neurons  
320 and the first-layer interneurons.

321           Our results indicate that the initial step of information processing that transforms

322 thermal information into stimulus valence occurs within the AFD sensory neuron and  
323 suggest that information processing for this transformation resides in cellular processes  
324 between calcium influx and neurotransmitter release. These observations underscore neural  
325 computation at axonal regions in a single neuron. In addition to the current view that neural  
326 computations take place at the synaptic communication and dendritic computations, our  
327 results highlight the importance of axonal computation in information processing in the  
328 nervous system. These observations, in turn, raise a future challenge in neuroscience.  
329 Although electrophysiological and calcium imaging analyses undoubtedly reveal certain  
330 aspects of neuronal properties, understanding the axonal computation requires the  
331 development of methods to quantitatively measure the release of the signaling molecules,  
332 including small neurotransmitters, neuropeptides and biogenic amines<sup>48,49</sup>, preferably in  
333 behaving animals with high spatiotemporal resolution. Utilization of a pH-sensitive green  
334 fluorescent protein, pHluorin<sup>50</sup> has been successfully used to monitor the release and  
335 recycle of synaptic vesicles<sup>51-54</sup>. However, since synaptic vesicle neurotransmitter content  
336 can be dynamically regulated in both vertebrates and invertebrates<sup>55,56</sup>, direct measurements

337 of signaling molecules rather than that of vesicle release are required to fully understand the  
338 neuronal output. Development of such methods would unveil the dynamics of axonal  
339 computations and help dissect the mechanisms by which neurons execute this type of  
340 neural computation.

341           Neurons expressing multiple neurotransmitters are present in virtually all animal  
342 species. Co-transmission of multiple transmitters from single neurons can influence the  
343 same target neurons (convergent actions) or different targets (divergent actions), thereby  
344 providing additional flexibility to the circuit functions<sup>57,58</sup>. A few studies reported  
345 co-transmission of multiple transmitters with opposing actions<sup>59-62</sup>. In mammals, orexin and  
346 dynorphin neuropeptides exert opposing actions on excitability of ventral tegmental area  
347 dopamine neurons<sup>59,60</sup>, and in *Aplysia* neuromuscular junction, multiple co-transmitted  
348 peptides exert antagonistic actions, with one peptide promoting muscle contraction and the  
349 other increasing relaxation rate<sup>61,62</sup>. In these cases, multiple transmitters are co-packaged  
350 and co-released in a fixed ratio. The apparently antagonistic actions of multiple transmitters  
351 likely facilitate rhythmic muscle contraction, thereby providing temporal flexibility in the



352 circuit function<sup>61,62</sup>.

353           Our results suggest that by altering the balance of multiple transmitters with  
354 opposing actions, a single presynaptic neuron can evoke excitatory and inhibitory  
355 postsynaptic responses, convey the valence information of sensory stimulus to the circuit,  
356 and induce an appropriate behavior. Our observations provide a sharp contrast to current  
357 views of presynaptic plasticity, in which presynaptic regulation facilitates or depresses the  
358 strength of the postsynaptic response<sup>63,64</sup> but does not change the mode of transmission  
359 from an excitatory (inhibitory) to an inhibitory (excitatory) communication. We speculate  
360 that such mechanism of presynaptic control might function in other systems<sup>65</sup> and be  
361 particularly effective in assigning the stimulus valence over a range of stimulus intensity.  
362 Since previous studies suggested that *dgk-1* regulates synaptic transmission at  
363 neuromuscular junction in *C. elegans*<sup>24,25,66</sup>, *kin-4*, *mec-2* and *dgk-1* might also regulate the  
364 release of glutamate and/or neuropeptide from AFD to control the bidirectional AIY  
365 response. Thus, presynaptic control of multi-transmitter release could be a fundamental  
366 mechanism of generating plasticity without extensive structural modification on the defined

367 neural circuitry, thereby extending the computational repertoire employed by the nervous

368 system.

369

370 **Methods**

371 *C. elegans* strains

372 All *C. elegans* strains were cultivated at 20 °C on nematode growth medium plates seeded  
373 with *E. coli* OP50 bacteria<sup>67</sup>. N2 (Bristol) was the wild-type strain. The following mutations,  
374 extrachromosomal arrays and integrated transgenes were generated or described previously.

375 LGI: *njIs24*[*gcy-8p::GCaMP3*, *gcy-8::TagRFP*]<sup>68</sup>. LG III: *eat-4(ky5)*<sup>34</sup>. LG IV:  
376 *kin-4(tm1049Δ)*, *kin-4(nj170Δ)*, *unc-31(e928)*<sup>67,69</sup>. LG V: *njIs110*[*gcy-8p::4xNLS::YCX1.6*,  
377 *AIYp::YCX1.6*]. LG X: *mec-2(nj89gf)*, *mec-2(nj251Δ)*, *dgk-1(nj271)*, *dgk-1(nj274Δ)*.

378 Extrachromosomal arrays: *njEx682*[*kin-4(+)*, *ges-1p::gfp*], *njEx683*[*kin-4::gfp*,  
379 *ges-1p::TagRFP*], *njEx753*[*gcy-8p::kin-4d cDNA*, *ges-1p::gfp*] (used for rescuing the  
380 cryophilic phenotype of *kin-4(tm1049Δ)*, *njEx759*[*ttx-3p::kin-4d cDNA*, *ges-1p::gfp*],  
381 *njEx760*[*lin-11p::kin-4d cDNA*, *ges-1p::gfp*], *njEx763*[*ceh-36p::kin-4d cDNA*,  
382 *ges-1p::gfp*], *njEx764*[*glr-3p::kin-4d cDNA*, *ges-1p::gfp*], *njEx1029*[*mec-2(E270K)*,  
383 *ges-1p::gfp*], *njEx1035*[*mec-2(+)*, *ges-1p::gfp*], *njEx1158*[*Pmec-2a::gfp*,  
384 *ges-1p::TagRFP*], *njEx1159*[*Pmec-2c::gfp*, *ges-1p::TagRFP*], *njEx1220*[*ceh-36p::mec-2a*  
385 *cDNA (E270K)*, *ceh-36p::mec-2c cDNA (E195K)*, *ges-1p::gfp*], *njEx1231*[*gcy-8p::mec-2a*

386 *cDNA (E270K), gcy-8p::mec-2c cDNA (E195K), ges-1p::gfp], njEx1317[gcy-8p::dgk-1b*  
387 *cDNA, ges-1p::gfp], njEx1319[odr-1p::dgk-1b cDNA, ges-1p::gfp], njEx1330[dgk-1(+),*  
388 *ges-1p::gfp], njEx1331[gcy-8p::dgk-1b cDNA, odr-1::dgk-1b cDNA, ges-1p::gfp],*  
389 *njEx1435[gcy-8p::kin-4d, ges-1p::TagRFP]* (used for rescuing AIY calcium response),  
390 *njEx1438[gcy-8p::unc-31 cDNA, ges-1p::TagRFP], njEx1439[gcy-8p::eat-4 cDNA,*  
391 *ges-1p::TagRFP].* We used following promoters for cell-specific expression of transgenes  
392 and cDNAs: *gcy-8* promoter for AFD; *ttx-3* promoter for AIY; *ceh-36* or *odr-1* promoters  
393 for AWC; *lin-11* promoter for AIZ; *glr-3* promoter for RIA; *ges-1* promoter for intestinal  
394 cells.

395

### 396 Thermotaxis behavioral tests

397 Thermotaxis assays were performed as previously described<sup>68</sup>. Animals that had been  
398 cultivated at 20 °C were placed on the center of thermotaxis assay plate with a temperature  
399 gradient ranging from 17 °C to 23 °C. The steepness of the temperature gradient was set at  
400 0.45 ~ 0.5 °C / cm. Animals were allowed to freely move on the plate for 1 hour. The

401 thermotaxis assay plate was divided into 8 sections along the temperature gradient, and the  
402 number of adult animals in each section was counted.

403

#### 404 Expression analysis of *kin-4* and *mec-2*

405 To construct *kin-4::gfp*, we modified the fosmid containing the *kin-4* locus,  
406 WRM0635dF07. We inserted a *gfp* coding sequence immediately before the stop codon of  
407 *kin-4* using bacterial recombineering. To construct *Pmec-2a::gfp* and *Pmec-2c::gfp*, a 3.5  
408 kb and a 3.2 kb fragments upstream of the start codon of *mec-2a* and *mec-2c* were cloned  
409 into the *gfp* expression vector pPD95.75, respectively. Animals carrying *kin-4::gfp*,  
410 *Pmec-2a::gfp* or *Pmec-2c::gfp* were anesthetized with 50 mM sodium azide and were  
411 observed under Nomarski optics equipped with epifluorescence. Identification of the AFD,  
412 ALM, AVM, AWC, AIY, PLM, PVM and RIA neurons was conducted by observing the  
413 positions and sizes of the nuclei and the patterns of neuronal processes.

414

#### 415 Multi worm tracking analysis

416 Multi worm tracking analysis was performed as described<sup>36</sup>. Animals were cultivated at  
417 20 °C and were placed on the thermal gradient with the center temperature of 18.5 °C or  
418 21.5 °C to monitor their behaviors below or above the cultivation temperature, respectively.  
419 The behaviors during the first 10 minutes of the thermotaxis assay were captured by a  
420 CMOS camera and were analyzed by multi worm tracker to obtain the coordinates of  
421 animal's centroids and spines<sup>35</sup>. The data were further analyzed by a custom-written  
422 program in MATLAB to classify the behaviors into behavioral components.

423

#### 424 Calcium imaging of AFD in immobilized animals

425 Calcium imaging of the AFD neuron was performed as described<sup>68</sup>. Animals expressing  
426 GCaMP3 and TagRFP in AFD were cultivated at 20 °C and placed on a 5 – 10 % agarose  
427 pad with polystyrene beads to immobilize the animals. Animals were subjected to a  
428 warming stimulus, and the fluorescence intensities from the AFD cell body were captured  
429 and analyzed by the MetaMorph software. The ratio of the fluorescence intensity  
430 (GCaMP3/TagRFP) was used to calculate ratio change, which was defined as (ratio –

431 baseline ratio)/baseline ratio, where baseline ratio was the mean of the ratio values during  
432 the first 30 seconds of the experiment. The response temperature was previously defined<sup>68</sup>  
433 as the temperature at which the ratio change first exceeded 1.

434

#### 435 Calcium imaging of AIY in freely moving animals

436 We generated animals expressing the ratiometric calcium probe YCX1.6 in AFD and AIY.  
437 YCX1.6 in AFD was localized to the nucleus to separate the fluorescence signals from  
438 these neurons. Animals were cultivated at 20 °C and placed on a 2 – 2.5 % agarose pad on a  
439 cover glass. The sample was covered by another cover glass and was placed onto a  
440 transparent temperature-controlled device (TOKAI HIT Co. Ltd., Fujinomiya). This device  
441 was installed onto a motorized stage (HawkVision Inc., Fujisawa) that keeps the target  
442 image of animals in the field of view. Controlling the stage movement was achieved by  
443 real-time analysis of transmitted infrared light images. The fluorescence images were  
444 captured twice a second and split into YFP and CFP channels by W-VIEW GEMINI  
445 (Hamamatsu photonics K.K., Hamamatsu). The YFP and CFP fluorescence intensities were

446 obtained from the cell body of AFD and an axonal region of AIY<sup>68</sup>. The fluorescent images  
447 were analyzed by a custom-written program in MATLAB with manual inspection of region  
448 of interest in every frame, and the fluorescent intensities of YFP and CFP were determined.  
449 We eliminated from the analysis the trials in which the temperature program failed to  
450 activate AFD. For this purpose, we applied a low-pass filter to the YFP/CFP ratio with the  
451 cut-off frequency at 0.05 Hz, and the resulting ratio data were used to calculate the ratio  
452 change. We eliminated from the analysis the trails in which the maximum ratio changes  
453 were smaller than 0.25 for recordings below the cultivation temperature or 0.22 for above  
454 the cultivation temperature. These threshold values were determined from experiments in  
455 which the temperature was kept constant. For the remainder of the trials, the ratio of  
456 fluorescence intensities (YFP/CFP) was used to calculate the standardized ratio change of  
457 AFD and AIY, which was defined as  $(\text{ratio} - \text{minimum ratio}) / (\text{maximum ratio} - \text{minimum}$   
458  $\text{ratio})$ . The baseline standardized ratio, which was the mean of the standardized ratio values  
459 of 5 consecutive frames immediately before the onset of warming stimulus, was subtracted  
460 from the standardized ratio change of each frame. For comparison of the peak standardized



461 ratio change, the maximum standardized ratio change (positive or negative) in a 2-second  
462 time window centered at the peak of the mean control standardized ratio change was used.

463

#### 464 Statistics

465 Normality of the data was assessed by Shapiro-Wilk test. Equal variance among data sets  
466 was assessed by *F*-test or Bartlett test. When both normality and equal variance were  
467 assumed for the data set, we used two-tailed student *t*-test for pairwise comparison and  
468 one-way analysis of variance (ANOVA) with Tukey-Kramer or Dunnett's test for multiple  
469 comparisons. In other cases, we applied Wilcoxon rank sum test for pairwise comparison  
470 and Kruskal-Wallis rank sum test with Steel method for multiple comparisons.

471

#### 472 **Data availability**

473 All raw images, source data and custom scripts are available from the authors upon  
474 reasonable request.

475

476 **References**

- 477 1. Zangrossi, H. & File, S. E. Behavioral consequences in animal tests of anxiety and  
478 exploration of exposure to cat odor. *Brain Res. Bull.* **29**, 381–388 (1992).
- 479 2. Terry, L. M. & Johanson, I. B. Olfactory influences on the ingestive behavior of  
480 infant rats. *Dev. Psychobiol.* **20**, 313–331 (1987).
- 481 3. Johnston, R. E. Effects of female odors on the sexual behavior of male hamsters.  
482 *Behav. Neural Biol.* **46**, 168–188 (1986).
- 483 4. Min, S., Ai, M., Shin, S. A. & Suh, G. S. B. Dedicated olfactory neurons mediating  
484 attraction behavior to ammonia and amines in *Drosophila*. *Proc. Natl. Acad. Sci.* **110**,  
485 E1321–E1329 (2013).
- 486 5. Kobayakawa, K. *et al.* Innate versus learned odour processing in the mouse olfactory  
487 bulb. *Nature* **450**, 503–508 (2007).
- 488 6. Mueller, K. L. *et al.* The receptors and coding logic for bitter taste. *Nature* (2005).  
489 doi:10.1038/nature03352
- 490 7. Zhao, G. Q. *et al.* The receptors for mammalian sweet and umami taste. *Cell* **115**,

- 491 255–266 (2003).
- 492 8. Marella, S. *et al.* Imaging taste responses in the fly brain reveals a functional map of  
493 taste category and behavior. *Neuron* **49**, 285–295 (2006).
- 494 9. Laing, D. G., Panhuber, H. & Baxter, R. I. Olfactory properties of amines and  
495 n-butanol. *Chem. Senses* **3**, 149–166 (1978).
- 496 10. Charro, M. J. & Alcorta, E. Quantifying relative importance of maxillary palp  
497 information on the olfactory behavior of *Drosophila melanogaster*. *J. Comp. Physiol.*  
498 *A* **175**, 761–766 (1994).
- 499 11. Malnic, B., Hirono, J., Sato, T. & Buck, L. B. Combinatorial receptor codes for  
500 odors. *Cell* **96**, 713–723 (1999).
- 501 12. Semmelhack, J. L. & Wang, J. W. Select *Drosophila* glomeruli mediate innate  
502 olfactory attraction and aversion. *Nature* **459**, 218–223 (2009).
- 503 13. Yoshida, K. *et al.* Odour concentration-dependent olfactory preference change in *C.*  
504 *elegans*. *Nat. Commun.* **3**, 711–739 (2012).
- 505 14. White, J. G., Southgate, E., Thomson, J. N. & Brenner, S. The Structure of the

- 506 Nervous System of the Nematode *Caenorhabditis elegans*. *Philos. Trans. R. Soc. B*  
507 *Biol. Sci.* **314**, 1–340 (1986).
- 508 15. Hedgecock, E. M. & Russell, R. L. Normal and mutant thermotaxis in the nematode  
509 *Caenorhabditis elegans*. *Proc. Natl. Acad. Sci. U. S. A.* **72**, 4061–4065 (1975).
- 510 16. Kuhara, A. *et al.* Temperature sensing by an olfactory neuron in a circuit controlling  
511 behavior of *C. elegans*. *Science* **320**, 803–807 (2008).
- 512 17. Mori, I. & Ohshima, Y. Neural regulation of thermotaxis in *Caenorhabditis elegans*.  
513 *Nature* **376**, 344–348. (1995).
- 514 18. Beverly, M., Anbil, S. & Sengupta, P. Degeneracy and Neuromodulation among  
515 Thermosensory Neurons Contribute to Robust Thermosensory Behaviors in  
516 *Caenorhabditis elegans*. *J. Neurosci.* **31**, 11718–11727 (2011).
- 517 19. Luo, L. *et al.* Bidirectional thermotaxis in *Caenorhabditis elegans* is mediated by  
518 distinct sensorimotor strategies driven by the AFD thermosensory neurons. *Proc.*  
519 *Natl. Acad. Sci.* **111**, 2776–2781 (2014).
- 520 20. Kimura, K. D., Miyawaki, A., Matsumoto, K. & Mori, I. The *C. elegans*

- 521 thermosensory neuron AFD responds to warming. *Curr. Biol.* **14**, 1291–1295 (2004).
- 522 21. Clark, D. A., Biron, D., Sengupta, P. & Samuel, A. D. T. The AFD Sensory Neurons  
523 Encode Multiple Functions Underlying Thermotactic Behavior in *Caenorhabditis*  
524 *elegans*. *J. Neurosci.* **26**, 7444–7451 (2006).
- 525 22. Walden, P. D. & Cowan, N. J. A Novel 205-Kilodalton Testis-Specific  
526 Serine/Threonine Protein Kinase Associated with Microtubules of the Spermatid  
527 Manchette. *Mol. Cell. Biol.* **13**, 7625–7635 (1993).
- 528 23. Huang, M., Gu, G., Ferguson, E. L. & Chalfie, M. A stomatin-like protein necessary  
529 for mechanosensation in *C. elegans*. *Nature* **378**, 292–295 (1995).
- 530 24. Miller, K. G., Emerson, M. D. & Rand, J. B. Gqalpha and diacylglycerol kinase  
531 negatively regulate the Gqalpha pathway in *C. elegans*. *Neuron* **24**, 323–333 (1999).
- 532 25. Nurrish, S., Ségalat, L. & Kaplan, J. M. Serotonin inhibition of synaptic  
533 transmission:  $g\alpha(o)$  decreases the abundance of *unc-13* at release sites. *Neuron* **24**,  
534 231–242. (1999).
- 535 26. Okochi, Y., Kimura, K. D., Ohta, A. & Mori, I. Diverse regulation of sensory

- 536 signaling by *C. elegans* nPKC-epsilon/eta TTX-4. *EMBO J.* **24**, 2127–2137 (2005).
- 537 27. Ohnishi, N., Kuhara, A., Nakamura, F., Okochi, Y. & Mori, I. Bidirectional  
538 regulation of thermotaxis by glutamate transmissions in *Caenorhabditis elegans*.  
539 *EMBO J.* **30**, 1376–1388 (2011).
- 540 28. Inada, H. *et al.* Identification of guanylyl cyclases that function in thermosensory  
541 neurons of *Caenorhabditis elegans*. *Genetics* **172**, 2239–2252 (2006).
- 542 29. Ramot, D., MacInnis, B. L. & Goodman, M. B. Bidirectional temperature-sensing by  
543 a single thermosensory neuron in *C. elegans*. *Nat. Neurosci.* **11**, 908–915 (2008).
- 544 30. Takeishi, A. *et al.* Receptor-type Guanylyl Cyclases Confer Thermosensory  
545 Responses in *C. elegans*. *Neuron* **90**, 235–244 (2016).
- 546 31. Hawk, J. D. *et al.* Integration of Plasticity Mechanisms within a Single Sensory  
547 Neuron of *C. elegans* Actuates a Memory. *Neuron* 356–367 (2018).  
548 doi:10.1016/j.neuron.2017.12.027
- 549 32. Narayan, A., Laurent, G. & Sternberg, P. W. Transfer characteristics of a  
550 thermosensory synapse in *Caenorhabditis elegans*. *Proc. Natl. Acad. Sci.* **108**,

- 551 9667–9672 (2011).
- 552 33. Speese, S. *et al.* UNC-31 (CAPS) Is Required for Dense-Core Vesicle But Not  
553 Synaptic Vesicle Exocytosis in *Caenorhabditis elegans*. *J. Neurosci.* **27**, 6150–6162  
554 (2007).
- 555 34. Lee, R. Y. N., Sawin, E. R., Chalfie, M., Horvitz, H. R. & Avery, L. EAT-4 , a  
556 Homolog of a Mammalian Sodium-Dependent Inorganic Phosphate Cotransporter ,  
557 Is Necessary for Glutamatergic Neurotransmission in *Caenorhabditis elegans*.  
558 *Neuron* **19**, 159–167 (1999).
- 559 35. Swierczek, N. A., Giles, A. C., Rankin, C. H. & Kerr, R. A. High-throughput  
560 behavioral analysis in *C. elegans*. *Nat. Methods* **8**, 592–598 (2011).
- 561 36. Ikeda, M. *et al.* Circuit Degeneracy Facilitates Robustness and Flexibility of  
562 Navigation Behavior in *C. elegans*. *bioRxiv* (2018). doi:10.1101/385468
- 563 37. Bruchas, M. R., Calhoon, G. G., Al-Hasani, R., Namburi, P. & Tye, K. M.  
564 Architectural Representation of Valence in the Limbic System.  
565 *Neuropsychopharmacology* **41**, 1697–1715 (2015).

- 566 38. Knaden, M. & Hansson, B. S. Mapping odor valence in the brain of flies and mice.  
567 *Curr. Opin. Neurobiol.* **24**, 34–38 (2014).
- 568 39. Guillermin, M. L., Carrillo, M. A. & Hallem, E. A. A Single Set of Interneurons  
569 Drives Opposite Behaviors in *C. elegans*. *Curr. Biol.* **27**, 2630–2639.e6 (2017).
- 570 40. Kim, J. *et al.* Rapid, biphasic CRF neuronal responses encode positive and negative  
571 valence. *Nat. Neurosci.* (2019). doi:10.1038/s41593-019-0342-2
- 572 41. Kocabas, A., Shen, C. H., Guo, Z. V. & Ramanathan, S. Controlling interneuron  
573 activity in *Caenorhabditis elegans* to evoke chemotactic behaviour. *Nature* **490**,  
574 273–277 (2012).
- 575 42. Kato, S. *et al.* Global Brain Dynamics Embed the Motor Command Sequence of  
576 *Caenorhabditis elegans*. *Cell* **163**, 656–669 (2015).
- 577 43. Luo, L. *et al.* Dynamic encoding of perception, memory, and movement in a *C.*  
578 *elegans* chemotaxis circuit. *Neuron* **82**, 1115–1128 (2014).
- 579 44. Li, Z., Liu, J., Zheng, M. & Xu, X. Z. S. Encoding of both analog- and digital-like  
580 behavioral outputs by one *C. elegans* interneuron. *Cell* **159**, 751–765 (2014).



- 581 45. Suzuki, H. *et al.* Functional asymmetry in *Caenorhabditis elegans* taste neurons and  
582 its computational role in chemotaxis. *Nature* **454**, 114–117 (2008).
- 583 46. Chalasani, S. H. *et al.* Dissecting a circuit for olfactory behaviour in *Caenorhabditis*  
584 *elegans*. *Nature* **450**, 63–70 (2007).
- 585 47. Kunitomo, H. *et al.* Concentration memory-dependent synaptic plasticity of a taste  
586 circuit regulates salt concentration chemotaxis in *Caenorhabditis elegans*. *Nat.*  
587 *Commun.* **4**, 1–11 (2013).
- 588 48. Marvin, J. S. *et al.* An optimized fluorescent probe for visualizing glutamate  
589 neurotransmission. *Nat. Methods* **10**, 162–170 (2013).
- 590 49. Sun, F. *et al.* A Genetically Encoded Fluorescent Sensor Enables Rapid and Specific  
591 Detection of Dopamine in Flies, Fish, and Mice. *Cell* **174**, 481–496 (2018).
- 592 50. Miesenbock, G., Rothman, D. A. D. A. & Rothman, J. E. Visualizing secretion and  
593 synaptic transmission with pH-sensitive green fluorescent proteins. *Nature* **394**,  
594 192–195 (1998).
- 595 51. Bozza, T., McGann, J. P., Mombaerts, P. & Wachowiak, M. In vivo imaging of

- 596 neuronal activity by targeted expression of a genetically encoded probe in the mouse.  
597 *Neuron* **42**, 9–21 (2004).
- 598 52. Li, Z. *et al.* Synaptic vesicle recycling studied in transgenic mice expressing  
599 synaptopHluorin. *Proc. Natl. Acad. Sci.* **102**, 6131–6136 (2005).
- 600 53. Ventimiglia, D. & Bargmann, C. I. Diverse modes of synaptic signaling, regulation,  
601 and plasticity distinguish two classes of *C. elegans* glutamatergic neurons. *Elife* **6**,  
602 1–25 (2017).
- 603 54. Sankaranarayanan, S. & Ryan, T. A. Calcium accelerates endocytosis of vSNAREs  
604 at hippocampal synapses. *Nat. Neurosci.* **4**, 129–136 (2001).
- 605 55. Aguilar, J. I. *et al.* Neuronal Depolarization Drives Increased Dopamine Synaptic  
606 Vesicle Loading via VGLUT. *Neuron* **95**, 1074–1088.e7 (2017).
- 607 56. Steinert, J. R. *et al.* Experience-Dependent Formation and Recruitment of Large  
608 Vesicles from Reserve Pool. *Neuron* **50**, 723–733 (2006).
- 609 57. Nusbaum, M. P., Blitz, D. M. & Marder, E. Functional consequences of  
610 neuropeptide and small-molecule co-transmission. *Nat. Rev. Neurosci.* **18**, 389–403

- 611 (2017).
- 612 58. Vaaga, C. E., Borisovska, M. & Westbrook, G. L. Dual-transmitter neurons:  
613 Functional implications of co-release and co-transmission. *Curr. Opin. Neurobiol.* **29**,  
614 25–32 (2014).
- 615 59. Baimel, C., Lau, B. K., Qiao, M. & Borgland, S. L. Projection-Target-Defined  
616 Effects of Orexin and Dynorphin on VTA Dopamine Neurons. *Cell Rep.* **18**,  
617 1346–1355 (2017).
- 618 60. Muschamp, J. W. *et al.* Hypocretin (orexin) facilitates reward by attenuating the  
619 antireward effects of its cotransmitter dynorphin in ventral tegmental area. *Proc. Natl.*  
620 *Acad. Sci.* **111**, E1648–E1655 (2014).
- 621 61. Vilim, F. S., Price, D. a, Lesser, W., Kupfermann, I. & Weiss, K. R. Costorage and  
622 corelease of modulatory peptide cotransmitters with partially antagonistic actions on  
623 the accessory radula closer muscle of *Aplysia californica*. *J. Neurosci.* **16**, 8092–104  
624 (1996).
- 625 62. Vilim, F. S., Cropper, E. C., Price, D. A., Kupfermann, I. & Weiss, K. R. Peptide

- 626 Cotransmitter Release from Motorneuron B16 in *Aplysia californica*: Costorage,  
627 Corelease, and Functional Implications. *J. Neurosci.* **20**, 2036–2042 (2000).
- 628 63. Monday, H. R. & Castillo, P. E. Closing the gap: long-term presynaptic plasticity in  
629 brain function and disease. *Curr. Opin. Neurobiol.* **45**, 106–112 (2017).
- 630 64. Regehr, W. G. Short-term presynaptic plasticity. *Cold Spring Harb. Perspect. Biol.* **4**,  
631 a005702 (2012).
- 632 65. Tsunozaki, M., Chalasani, S. H. & Bargmann, C. I. A Behavioral Switch: cGMP and  
633 PKC Signaling in Olfactory Neurons Reverses Odor Preference in *C. elegans*.  
634 *Neuron* **59**, 959–971 (2008).
- 635 66. McMullan, R., Hiley, E., Morrison, P. & Nurrish, S. J. Rho is a presynaptic activator  
636 of neurotransmitter release at pre-existing synapses in *C. elegans*. *Genes Dev.* **20**,  
637 65–76 (2006).
- 638 67. Brenner, S. The genetics of *Caenorhabditis elegans*. *Genetics* **77**, 71–94 (1974).
- 639 68. Kobayashi, K. *et al.* Single-Cell Memory Regulates a Neural Circuit for Sensory  
640 Behavior. *Cell Rep.* **14**, 11–21 (2016).

641 69. Charlie, N. K., Schade, M. A., Thomure, A. M. & Miller, K. G. Presynaptic UNC-31  
642 (CAPS) is required to activate the *Gαs* pathway of the *Caenorhabditis elegans*  
643 synaptic signaling network. *Genetics* **172**, 943–961 (2006).

644

#### 645 **Acknowledgments**

646 We thank Y. Kohara, K. G. Miller for cDNAs; S. Mitani at National BioResource for  
647 strains; K. Noma for comments on this manuscript; K. Ikegami, Y. Murakami, J. Okada, T.  
648 Sakaki, K. Sawayama, F. Takeshige for technical assistance. M.I. was supported by  
649 KAKENHI 16J05770. This work was supported by JSPS KAKENHI Grant Numbers  
650 17K07499 (to S.N.), 18H05123 (to S.N.), 26560549 (to Y.T.), 16H06536 (to K.H.)  
651 18H04693 (to I.M.), 16H01272 (to I.M.), 16H02516 (to I.M.) and by ERATO project  
652 (JPMJER1004 to TH) from JST.

653

#### 654 **Author Contributions**

655 S.N. and I.M. designed the experiments. S.N., R.A., A.S. and R.K. conducted experiments.

656 S.N. and M.I. wrote custom codes for the analyses. Y.T., X.F. and K.H. developed and set  
657 up the tracking system for calcium imaging of freely moving animals. T. S., K. I. and T. H.  
658 conducted whole genome sequencing of mutants isolated in this study. S.N. and I. M. wrote  
659 the manuscript.

660

#### 661 **Competing Interests**

662 The authors declare no competing interests.

663

#### 664 **Materials & Correspondence**

665 Correspondence and requests for materials should be addressed to I.M. (email:

666 [m46920a@nucc.cc.nagoya-u.ac.jp](mailto:m46920a@nucc.cc.nagoya-u.ac.jp))

667

668

669

## 670 **Figure Legends**

### 671 **Figure 1. *kin-4*, *mec-2* and *dgk-1* Regulate the *C. elegans* Thermotaxis Behavior**

672 (a) Procedure of thermotaxis assay is shown. Animals were cultivated at 20 °C and were  
673 placed on the center of a thermal gradient ranging from 17 °C to 23 °C. Each assay  
674 typically contains 100 ~ 200 animals. Distribution of the animals in each section of the  
675 assay plate was determined. We also use thermotaxis (TTX) index to quantify the behavior.  
676 The formula of TTX index is shown. (b-f) Thermotaxis behavior of the wild type, *kin-4*,  
677 *mec-2* and *dgk-1* mutant animals. Distributions of the animals in each section of the assay  
678 plate (top) are shown as means  $\pm$  s.e.m. TTX indices (bottom) are shown as dots. Lines  
679 indicate the means. *n* represents the number of independent experiments. *P* values were  
680 determined by Kruskal-Wallis test with Steel method for comparison to the wild-type  
681 animals in (b), one-way ANOVA with Dunnett's test for comparison to *kin-4(tm1049Δ)*  
682 mutants in (c), two-tailed Student's *t*-tests in (d) and one-way ANOVA with Tukey-Kramer  
683 test in (e) and (f).

684

685 **Figure 2. *kin-4*, *mec-2* and *dgk-1* Function in the AFD Thermosensory Neurons to**

686 **Regulate Thermotaxis**

687 (a) Neural circuit involved in thermotaxis. Arrows indicate chemical synapses. Triangles

688 and hexagons represent sensory and interneurons, respectively. (b) Expression analyses of

689 *kin-4::gfp* (Top) and *Pmec-2c::gfp* (Bottom). Head regions of animals are shown. The

690 arrowheads indicate the AFD and AWC sensory neurons. Scale bars, 10  $\mu\text{m}$ . (c-e)

691 Thermotaxis behaviors of animals in which *kin-4*, *mec-2(E270K)* or *dgk-1* cDNA was

692 specifically expressed in AFD and other neurons. Animals were cultivated at 20 °C.

693 Distributions of animals in each section of the assay plates are shown as means  $\pm$  s.e.m.

694 TTX indices are shown as dots, and the lines indicate means. *n* indicates the number of the

695 independent experiments. Animals were cultivated at 20 °C. *P* values were determined by

696 one-way ANOVA with Dunnett's test for multiple comparison to *kin-4(tm1049Δ)* in (c) or

697 *dgk-1(nj274Δ)* in (e). Kruskal-Wallis test with Steel method was used for comparison to the

698 wild-type animals in (d).

699



700 **Figure 3. *kin-4*, *mec-2* and *dgk-1* Regulate a Process Downstream of Calcium Influx in**

701 **AFD**

702 (a) Temperature program used for calcium imaging of the AFD neurons in immobilized

703 animals. (b) Ratio changes of the AFD calcium dynamics are shown. Grey lines are results

704 for individual traces; thick colored lines represent mean values. *N* indicates the number of

705 animals observed. (c) Comparison of the maximum ratio changes in each strain. Individual

706 data points are shown as dots. Boxes display the first and third quartiles; lines inside the

707 boxes are the medians; the whiskers extend to 1.5-time interquartile range from the box.

708 Kruskal-Wallis test with Steel method was used to compare to the wild type animals. (d)

709 Comparison of the response temperatures in the wild type, *kin-4*, *mec-2* and *dgk-1* mutants.

710 The response temperature was defined previously<sup>68</sup> as the temperature at which the ratio

711 change first exceeded 1. Individual data points are shown as dots. Boxes display the first

712 and third quartiles; lines inside the boxes are the medians; the whiskers extend to 1.5-time

713 interquartile range from the box. *P* values were determined by one-way ANOVA with

714 Dunnett's test for comparison to the wild type.

715

716 **Figure 4. The Bidirectional AIY Response Encodes Stimulus Valence and Is**  
717 **Regulated by *kin-4*, *mec-2* and *dgk-1***

718 Calcium imaging of AFD and AIY neurons in freely moving animals. **(a-d)** Calcium  
719 imaging below the cultivation temperature. **(e-g)** Calcium imaging above the cultivation  
720 temperature. **(a, e)** Neurons imaged and the temperature program used. **(b, f)** Standardized  
721 ratio changes of AFD (top) and AIY (bottom) calcium dynamics. Grey lines are results for  
722 individual traces; colored lines represent mean values. Time 0 corresponds to the onset of  
723 the warming stimulus. *n* indicates the number of trials. *N* indicates the number of animals  
724 observed. Note that the scales for the mean values are on the right axis. **(c, d, g)**  
725 Comparisons of peak AIY standardized ratio changes. Individual data points are shown as  
726 dots. Boxes display the first and third quartiles; lines inside the boxes are the medians; the  
727 whiskers extend to 1.5-time interquartile range from the box. *P* values were determined by  
728 Kruskal-Wallis test with Steel method to compare to the wild type animals in (c) and (g) or  
729 by Wilcoxon rank sum test in (d).

730

731 **Figure 5. Alteration of the AFD-AIY Synaptic Valence Requires Components**  
732 **Essential for Neuropeptide and Glutamate Release**

733 (a-d) Calcium imaging below the cultivation temperature. (e-h) Calcium imaging above  
734 the cultivation temperature. (a, e) The temperature program used. (b, f) Standardized ratio  
735 changes of AFD (top) and AIY (bottom) calcium dynamics. Grey lines are results for  
736 individual traces; colored lines represent mean values. Time 0 corresponds to the onset of  
737 the warming stimulus. *n* indicates the number of trials. *N* indicates the number of animals  
738 observed. Note that the scales for the mean values are on the right axis. (c, d, g, h)  
739 Comparisons of peak AIY standardized ratio changes. Individual data points are shown as  
740 dots. Boxes display the first and third quartiles; lines inside the boxes are the medians; the  
741 whiskers extend to 1.5-time interquartile range from the box. *P* values were determined by  
742 Kruskal-Wallis test with Steel method was used to compare to the wild type animals in (c)  
743 and (g) or by Wilcoxon rank sum test in (d) and (h). Note that the wild-type data are  
744 identical to those shown in Fig. 4 and indicated here for comparison to *unc-31* and *eat-4*

745 mutants.

746

747 **Figure 6. *kin-4*, *mec-2* and *dgk-1* Regulate Curving Bias During Thermotaxis**

748 Multi-worm tracking analyses of curve (a), shallow turn (b), omega turn (c), reversal (d)

749 and reversal turn (e). Schematics of the behavioral components are shown (left). Animals

750 were cultivated at 20 °C ( $T_c$ ), and their behaviors within the temperature ranges from

751 17.0 °C to 20.0 °C (middle) or from 20 °C to 23.0 °C (right) were monitored. (a) Curve is

752 characterized by two angles  $\phi$  and  $\theta$ , where  $\phi$  corresponds to the change in the moving

753 direction during forward locomotion, and  $\theta$  animal's previous moving direction relative to

754 the vector pointing to the warm side of the temperature gradient.  $\phi$  is given as a positive

755 value if the angle change is directed toward the warmer side and a negative value if directed

756 toward the colder side (left). Dot plots of mean curving rate of animals migrating up the

757 temperature gradient below (middle) or above (right) the cultivation temperature. The

758 curving rates of all animals during the first 10 minutes of thermotaxis assay were averaged

759 and shown as dots.  $n$  indicates the number of independent experiments.  $P$  values were

760 determined by one-way ANOVA with Dunnett's test for comparison to the wild-type  
761 animals. **(b-e)** Turns were classified into shallow turn (b) and omega turn (c), and reversals  
762 were divided into reversal (d) and reversal turn (e). The angle  $\psi$ , which represents the  
763 change in the direction after the turns or reversals, was used to classify the turns and  
764 reversals (left). Dot plots of frequencies of each behavioral component while animals were  
765 migrating up the temperature gradient below (middle) or above (right) the cultivation  
766 temperature. The frequencies of the behavioral component of all animals during the first 10  
767 minutes of thermotaxis assay were averaged and shown as dots.  $n$  indicates the number of  
768 independent experiments.  $P$  values were determined by one-way ANOVA with Dunnett's  
769 test or by Kruskal-Wallis test with Steel method for comparison to the wild-type animals.

## Figure 1

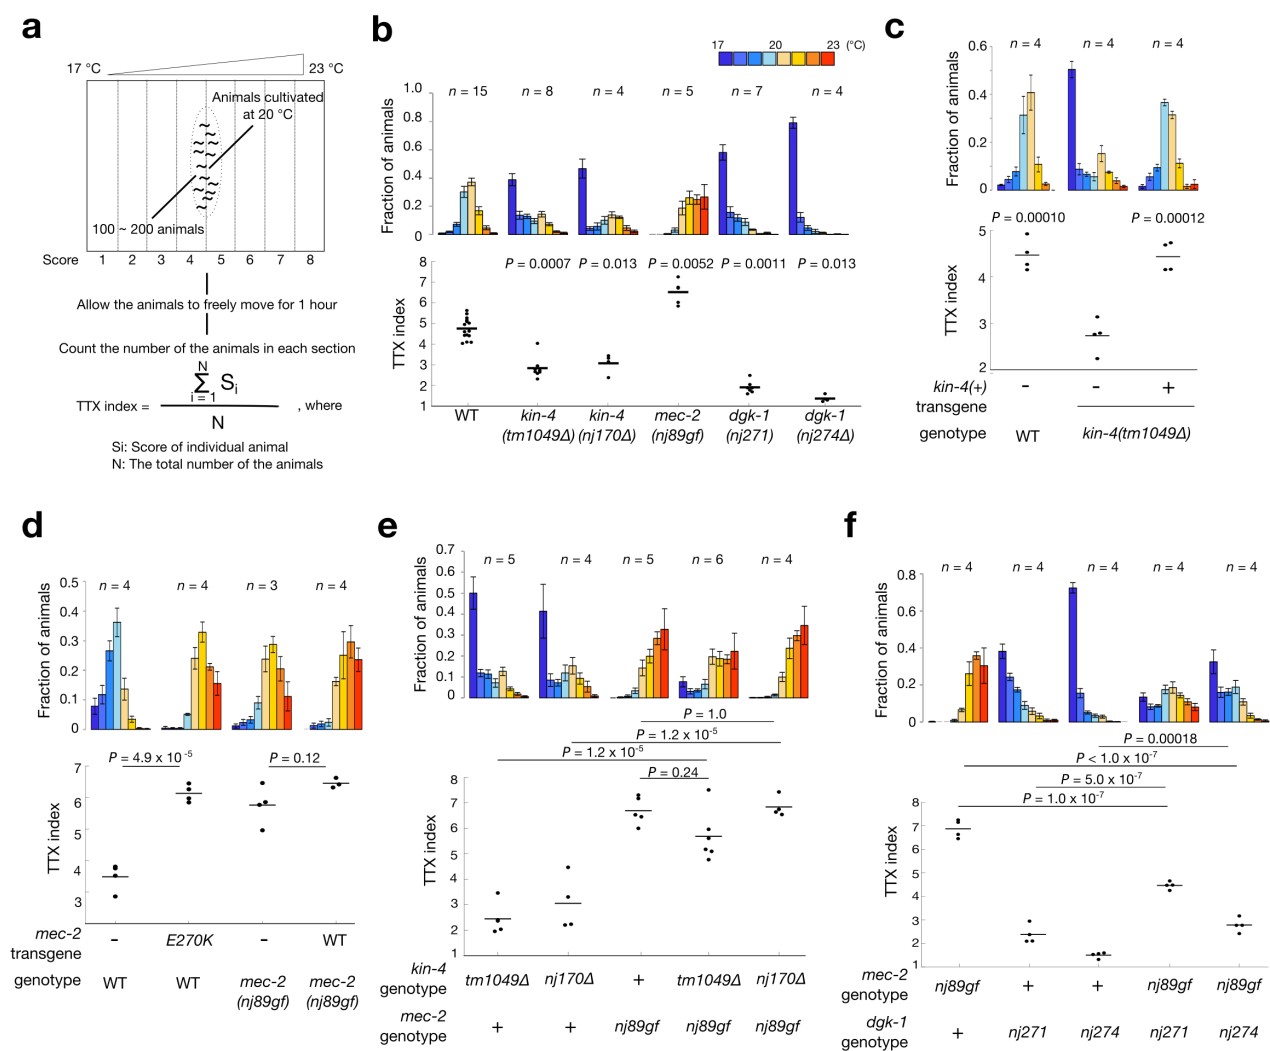

## Figure 2

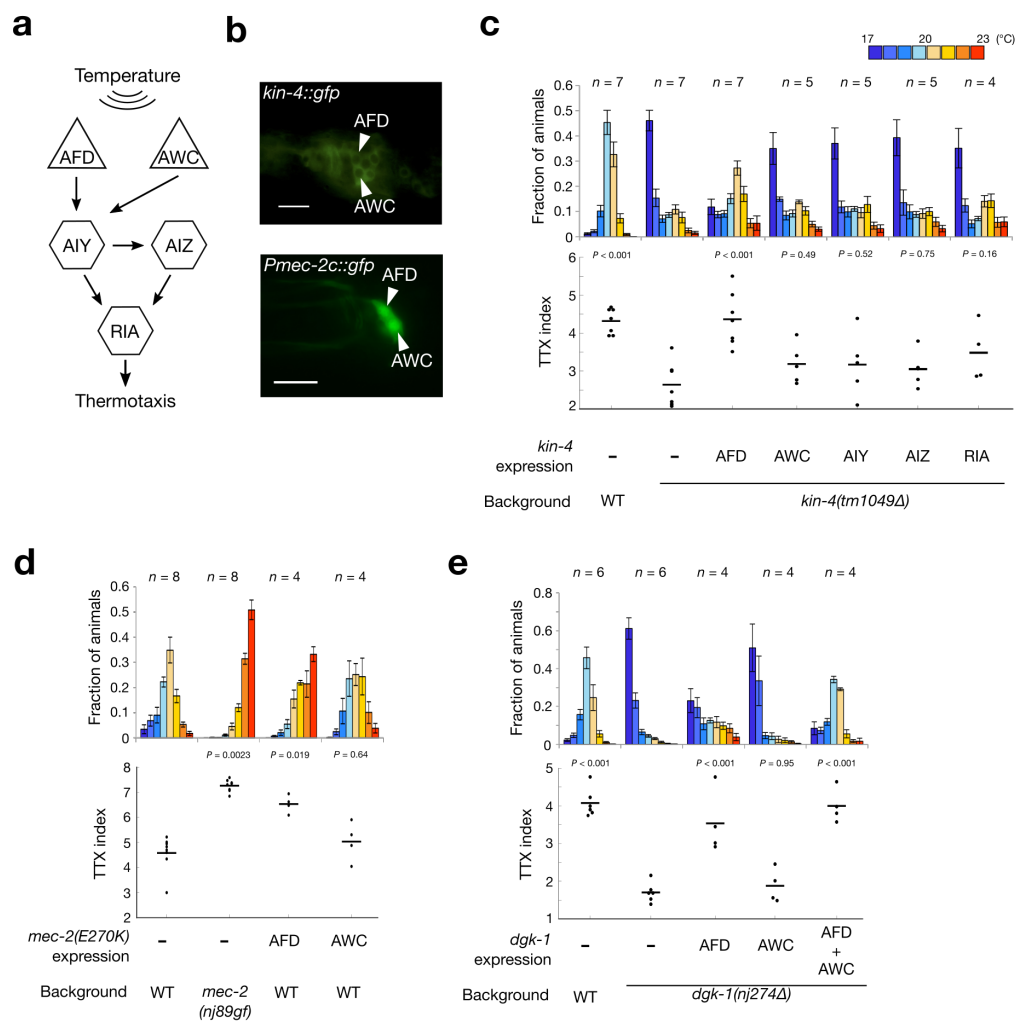

### Figure 3

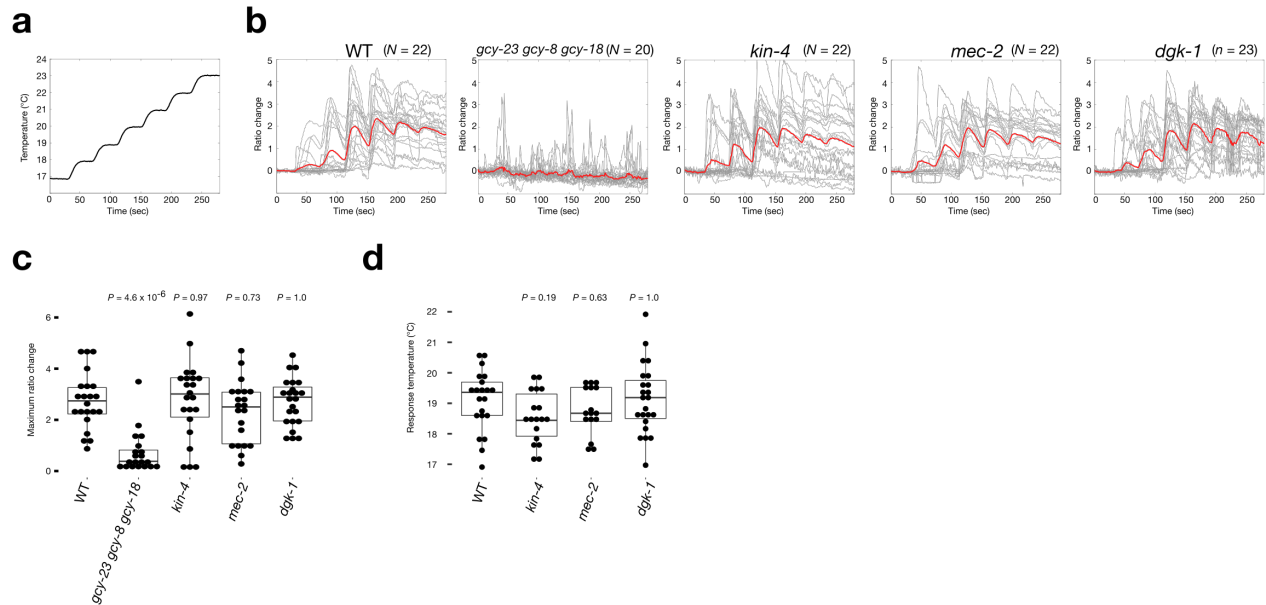



## Figure 4

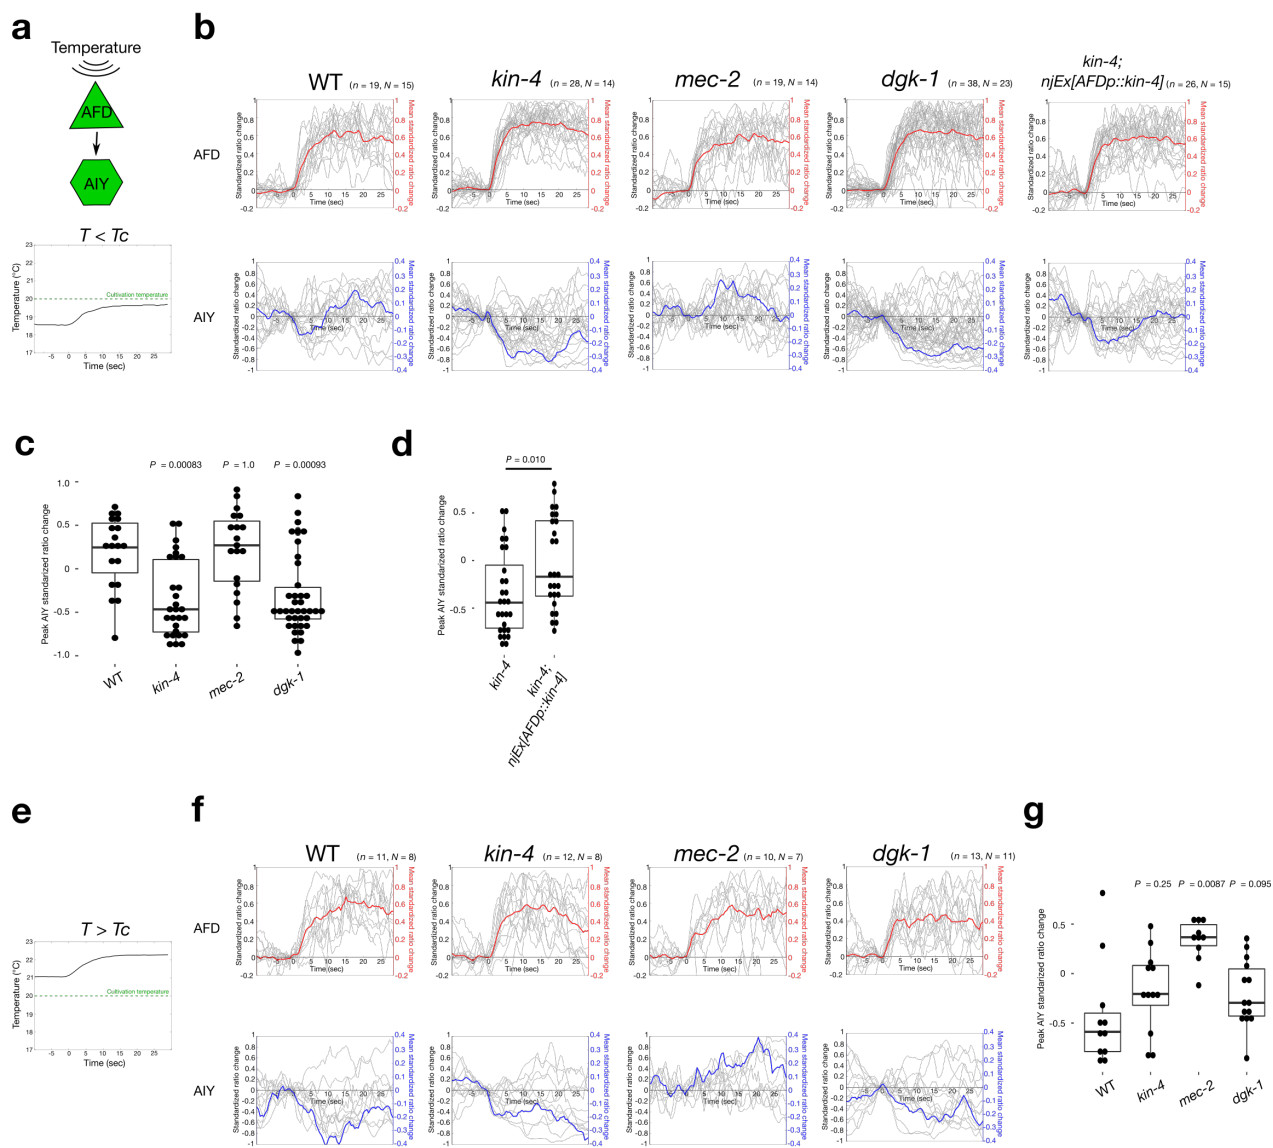

## Figure 5

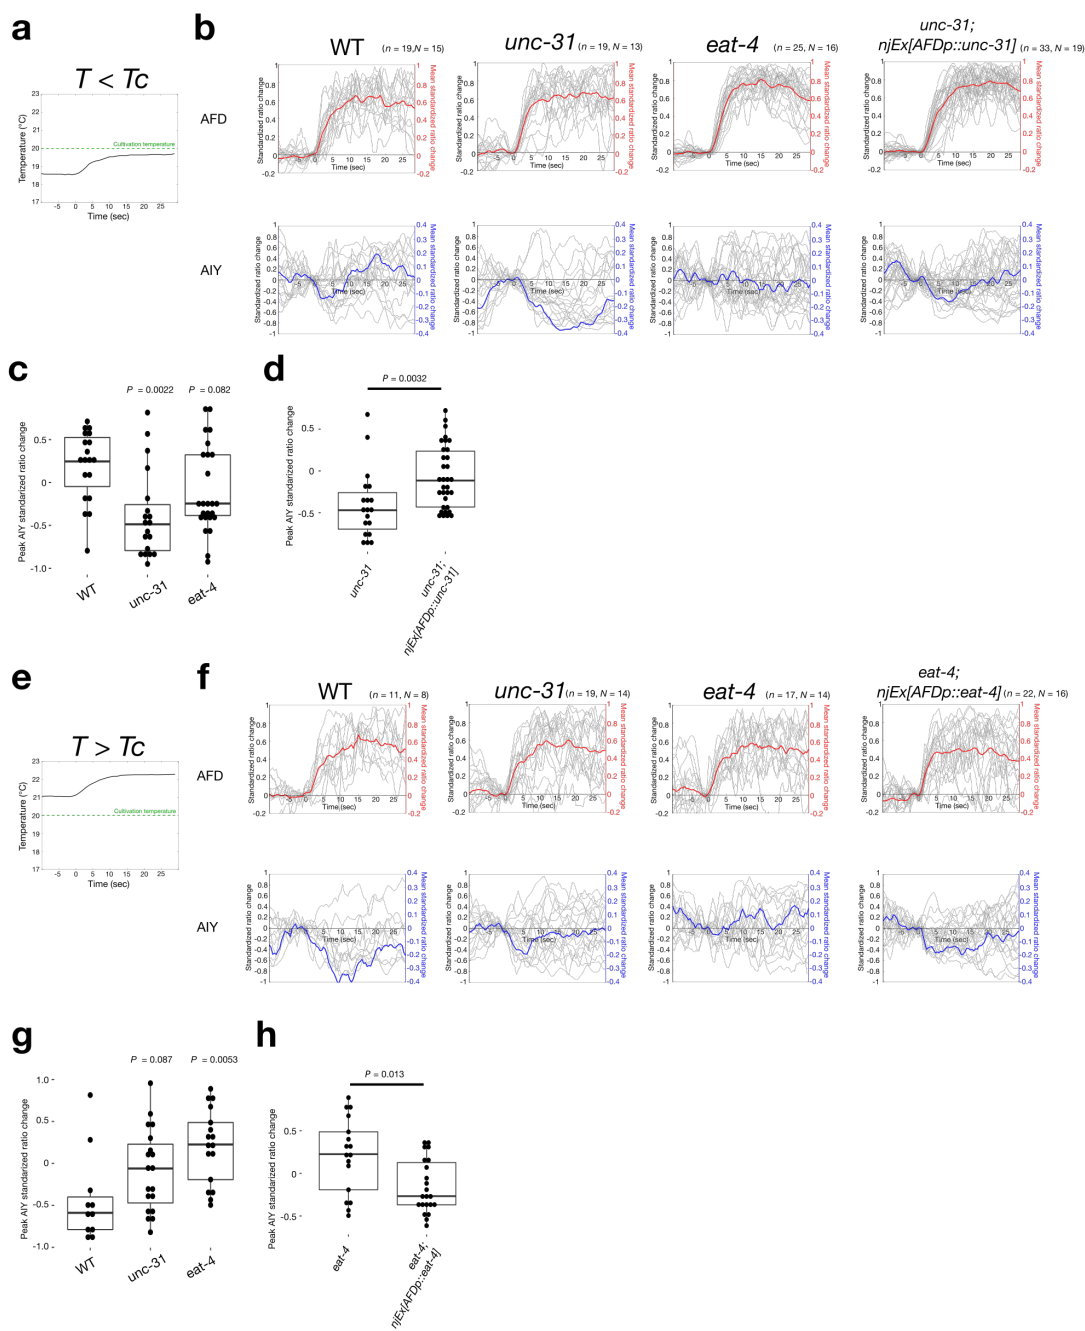

## Figure 6

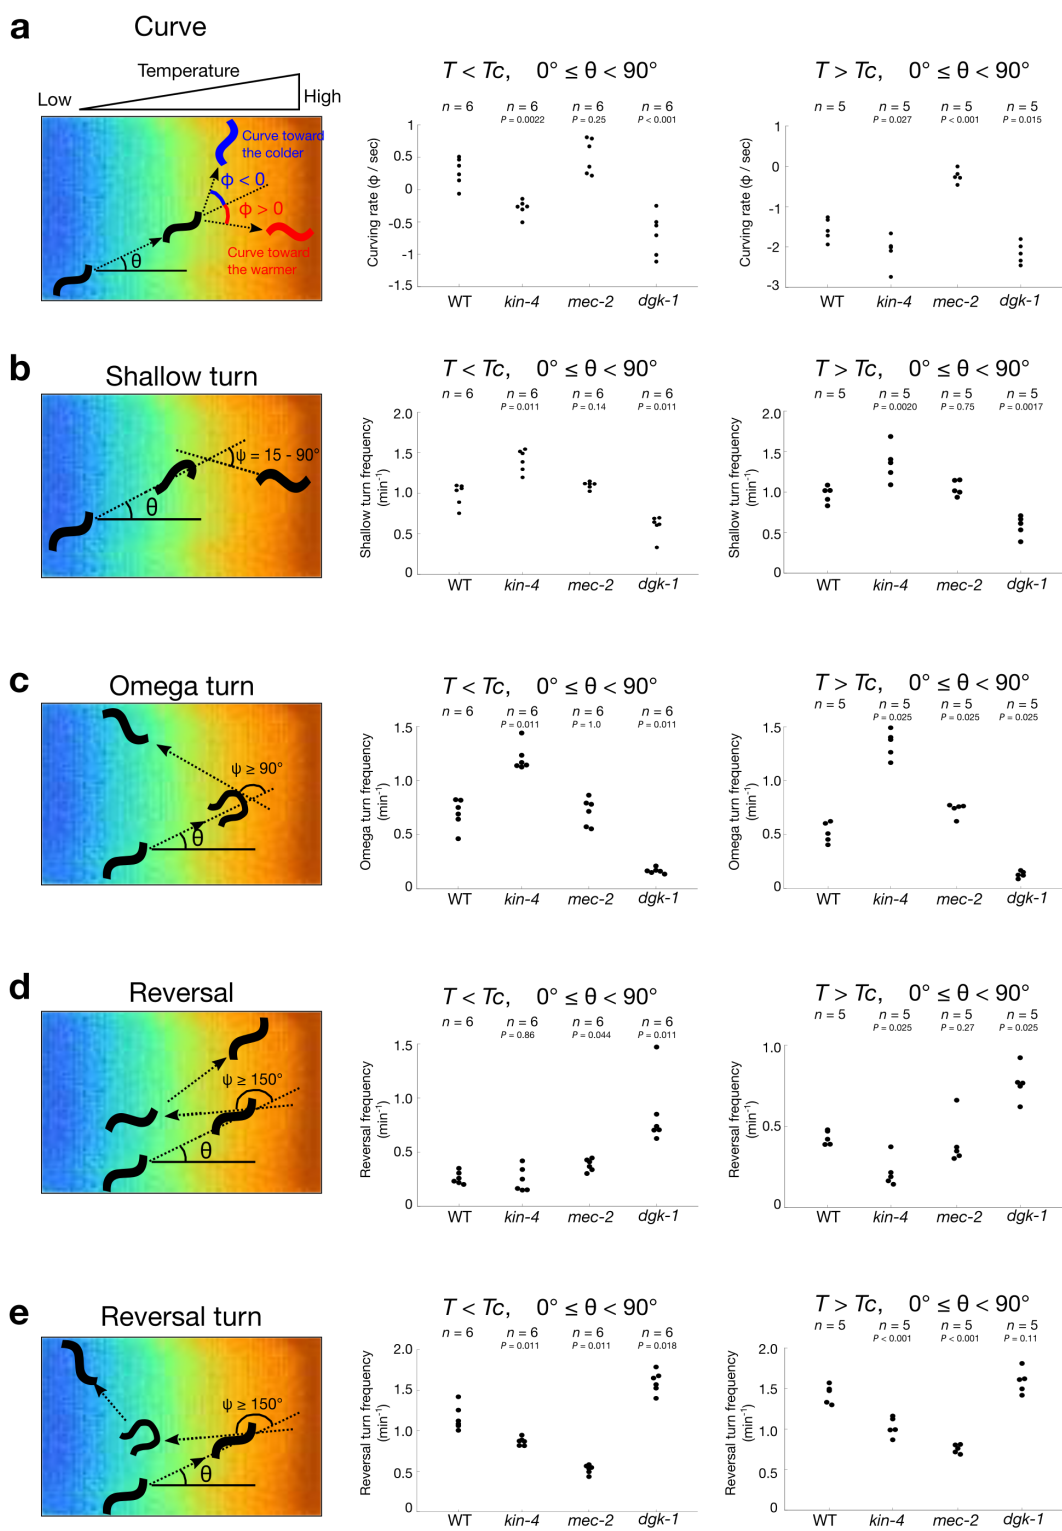

770 **Supplemental Information**

771 **Supplemental Figure Legends**

772

773 **Supplemental Figure 1. *kin-4*, *mec-2* and *dgk-1* Regulate Thermotaxis Behavior.**

774 (a) Gene structures of *kin-4* (top), *mec-2* (middle) and *dgk-1* (bottom) and mutations

775 associated with each mutant are shown. Filled boxes and triangles represent exons, empty

776 boxes and triangles untranslated region, and lines introns. (b, c) Thermotaxis behaviors of

777 *dgk-1(nj274Δ)* carrying a genomic *dgk-1(+)* transgene (b) and *mec-2(nj251Δ)* mutants (c).

778 Animals were cultivated at 20 °C and were placed on a thermal gradient ranging from

779 17 °C to 23 °C. Distributions of the animals (top) in each section of the assay plates are

780 shown as means ± s.e.m. TTX indices (bottom) are shown as dots. Lines indicate the means.

781 *P* values were determined by one-way ANOVA with Dunnett's test for comparison to

782 *dgk-1(nj274Δ)* mutants (b) and two-tailed Student's *t*-tests in (c).

783

784 **Supplemental Figure 2. Expression analysis of *kin-4::gfp* and *Pmec-2::gfp*.**

785 (a) Thermotaxis behavior of animals carrying a translational *kin-4::gfp* fusion. Wild-type,  
786 *kin-4(tm1049Δ)* mutants and *kin-4(tm1049Δ)* animals carrying the *kin-4::gfp* transgene  
787 were cultivated at 20 °C and subjected to thermotaxis assay. Distributions of the animals in  
788 each section of the assay plates are shown as means  $\pm$  s.e.m (top). *n* indicates the number of  
789 the independent experiments. TTX indices are shown as dots. Lines indicate the means. *P*  
790 values were determined by one-way ANOVA with Dunnett's test for comparison to  
791 *kin-4(tm1049Δ)* animals. (b) Expression analysis of the *kin-4::gfp* transgene. Head regions  
792 of animals are shown. The *kin-4::gfp* fusion was expressed in the AIY (left) and RIA  
793 (right) interneurons. Scale bars, 10  $\mu$ m. (c) Expression analysis of *Pmec-2a::gfp*. The  
794 entire body of an animal is shown. The *Pmec-2a::gfp* reporter was expressed in the ALM,  
795 AVM, PLM and PVM neurons. Scale bar, 50  $\mu$ m.

796

797 **Supplemental Figure 3. Model of curve regulation by alteration of AFD-AIY neuronal**

798 **communication.**

799 Below the cultivation temperature (left), a head bending toward warmer side of the

800 temperature gradient activates both AFD and AIY, leading to curve toward warmer side.

801 Above the cultivation temperature (right), a temperature increase activates AFD, which in

802 turn, inhibits AIY, leading to curve toward colder side.

803

## Supplementary Figure 1

**a**

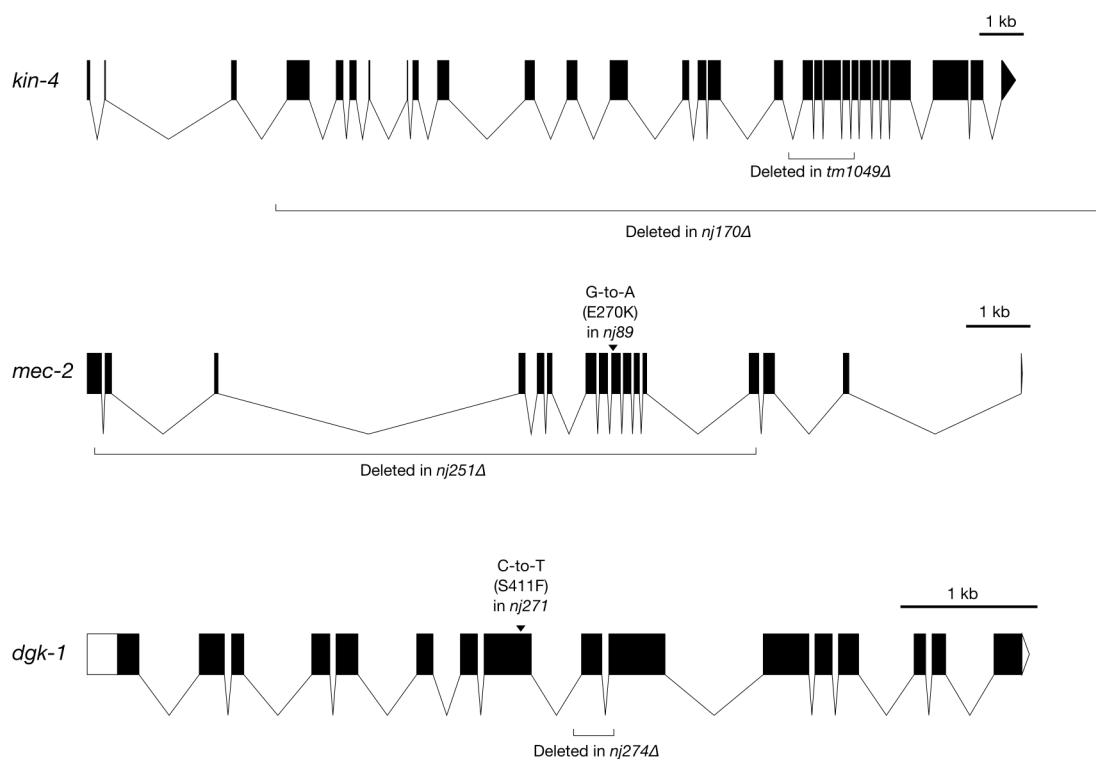

**b**

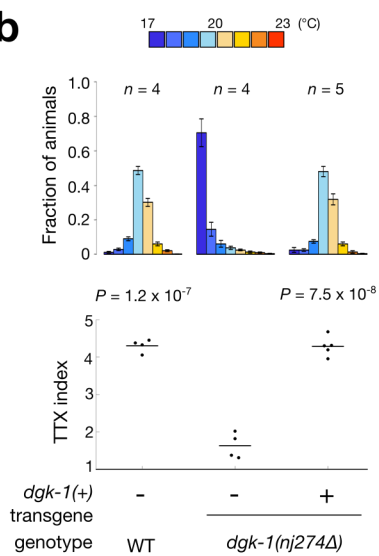

**c**

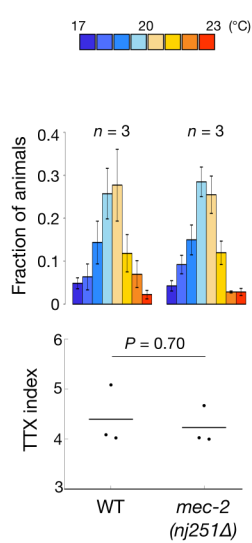

## Supplementary Figure 2

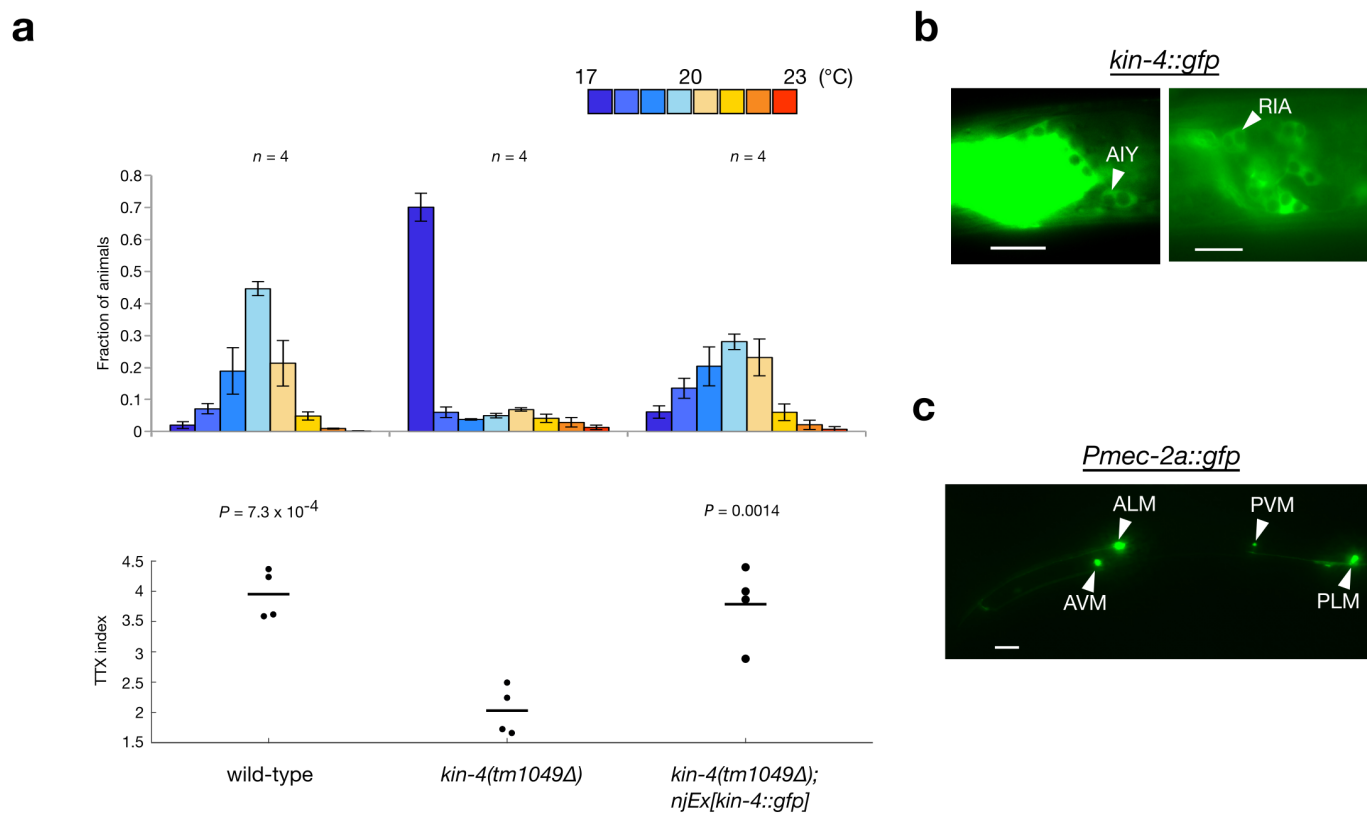



### Supplementary Figure 3

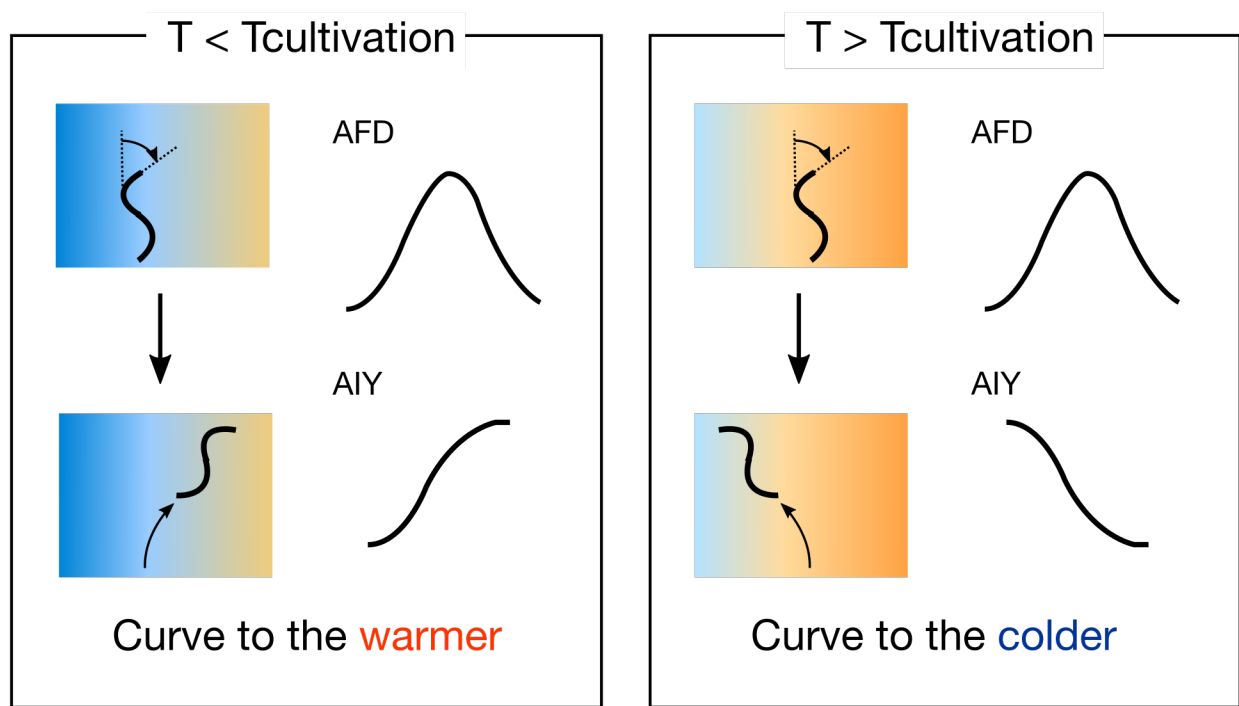

Source: http://biorxiv.org/content/10.1101/609479v1.full.pdf
